# Supplementary material for: Hardwiring of fine synaptic layers in the zebrafish visual pathway
Source: PubMed Central journal article supplement (PMC2647910; doi:10.1186/1749-8104-3-36), 2008-12-16

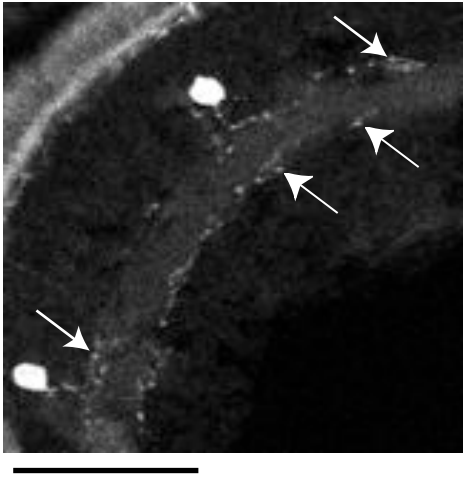

Supplement: 1749-8104-3-36-S1.pdf [file 1749-8104-3-36-S1.pdf]
